# Supplementary material for: A Synthesized Study of the Spatiotemporal Evolution of Central Yellow Sea Mud Depositional Processes During the Holocene
Source: Frontiers journal article supplement (doi:10.3389/feart.2021.687344), 2021-05-28
Supplement: Table_1.XLSX [file Table_1.XLSX]

## Sheet: Mud thickness
Cores	Latitude	Longitude	Water depth (m)	Core length	Sampling method	Mud deposition		Reaches the lower boundary of the Holocene Mud layer?	References
	(°N)	(°E)		(m)		Thickness (m)	Approach identified
A01	36.34	122.92	67.3	2.81	Gravity Core	2.81	Coarse fraction	No	This study
A04	35	124	72	2.8	Gravity Core	0	Coarse fraction	\	This study
C03	35	122.5	66.2	2.1	Gravity Core	1.15	Coarse fraction	Yes	This study
C04	34.98	123.03	74.8	3.31	Gravity Core	2.48	Coarse fraction	Yes	This study
C05	35	123.5	78.3	1.78	Gravity Core	0	Coarse fraction	\	This study
C07	35	124.5	91.7	1.43	Gravity Core	0	Coarse fraction	\	This study
N04	36.06	123.75	78.1	3.06	Gravity Core	2.04	Coarse fraction	Yes	This study
N05	36.06	124.08	78.9	3.64	Gravity Core	1.4	Coarse fraction	Yes	This study
N06	36	124.36	82	2.54	Gravity Core	1.1	Coarse fraction	Yes	This study
S04	33.94	123	65.2	2.74	Gravity Core	0	Coarse fraction	\	This study
A02	36.07	123.19	73.4	3.37	Gravity Core	2.99	Grain size data	Yes	(Gong et al., 2017; Wu et al., 2019)
A03	35.46	123.63	77.6	3	Gravity Core	2.8	Coarse fraction	Yes	(Jia et al., 2019); This study
N02	36.06	122.65	64	2.98	Gravity Core	2.98	Grain size data	No	(Hao et al., 2017; Zhong et al., 2018)
43	36	122.33	54	3.65	Gravity Core	3.65	Lithology	No	(Wang et al., 1987)
46	36	123	71	4.8	Gravity Core	4.8	Lithology	No	(Wang et al., 1987)
47	36	123.33	74	3.75	Gravity Core	3.75	Lithology	No	(Wang et al., 1987)
50	36	124	78	4.3	Gravity Core	2.35	Lithology	Yes	(Wang et al., 1987)
52	36	124.33	75	4.4	Gravity Core	2.7	Lithology	Yes	(Wang et al., 1987)
72	35	122.83	71	3.75	Gravity Core	3	Lithology	Yes	(Wang et al., 1987)
90	34	122.5	35	3.1	Gravity Core	0	Lithology	\	(Wang et al., 1987)
91	34	122.83	63	3.31	Gravity Core	0	Lithology	\	(Wang et al., 1987)
92	34	123	68	3.75	Gravity Core	0	Lithology	\	(Wang et al., 1987)
93	34	123.33	70	3.31	Gravity Core	0	Lithology	\	(Wang et al., 1987)
94	34	123.67	72	4	Gravity Core	0	Lithology	\	(Wang et al., 1987)
96	34	124.17	80	3.3	Gravity Core	0	Lithology	\	(Wang et al., 1987)
97	34	124.5	84	3	Gravity Core	0	Lithology	\	(Wang et al., 1987)
8409	34.29	122.91	72.4	0.77	Gravity Core	0.35	Lithology	Yes	(Zheng, 1989)
8411	34.27	123.57	78.3	1.25	Gravity Core	0.4	Lithology	Yes	(Zheng, 1989)
8412	34.25	123.97	81.6	3.78	Gravity Core	1.34	Lithology	Yes	(Zheng, 1989)
8407-1	34.31	122.27	50.3	3.27	Gravity Core	0	Lithology	\	(Zheng, 1989)
8407-2	34.31	122.27	50.3	0.76	Gravity Core	0	Lithology	\	(Zheng, 1989)
8410-1	34.29	123.25	75	3	Gravity Core	0.37	Lithology	Yes	(Zheng, 1989)
HS1	35.5	123..50	72	2.8	Gravity Core	2.8	Grain size data	No	(Ai et al., 2020)
PK48	35.02	123.37	\	\	\	2.6	Lithology	Yes	(Alexander et al., 1991)
11YS-PCL14	36.31	124.19	80	7.02	Piston Core	1.4	Grain size data	Yes	(Badejo et al., 2016; Badejo et al., 2014)
01P10	34.73	123.61	\	2.62	Piston Core	0	Lithology	\	(Chough et al., 2004; Shinn et al., 2004)
01P14	35.24	123.11	\	3.72	Piston Core	2.15	Lithology	Yes	(Chough et al., 2004; Shinn et al., 2004)
01P15	35.24	123.72	\	2.94	Piston Core	0.82	Lithology	Yes	(Chough et al., 2004; Shinn et al., 2004)
EY02-2	34.5	123.5	79	70	Drilling Core	1.18	Grain size data	Yes	(Ge et al., 2006)
B01	36.43	123.38	71	2.78	Gravity Core	1	Grain size data	Yes	(Han et al., 2016)
ZY-2	35.52	122.65	68.5	3.6	Piston Core	3.6	Grain size data	No	(Hu et al., 2012; Wang et al., 2011)
ZY-1	35.53	123	70.3	3.95	Piston Core	3.95	Grain size data	No	(Hu et al., 2012; Wu et al., 2016)
ZY-3	35.52	122.4	56	3.8	Piston Core	3.8	Grain size data	No	(Hu et al., 2012; Wu et al., 2016)
YSC-1	35.53	123.67	76.2	4.37	Gravity Core	3.65	Grain size data	Yes	(Hu et al., 2018; Li et al., 2014b)
YS01	35.52	122.49	58.5	3.69+26.41	Gravity Core and Drilling Core	11.1	Grain size data	Yes	(Jia et al., 2019; Wang et al., 2014b)
YA01	36.38	123.48	76	60.06	Drilling Core	1.92	Grain size data	Yes	(Jiang et al., 2009)
CC02	36.13	123.82	77.5	2.78	Gravity Core	1.2	Lithology	Yes	(Kim et al., 1999; Kim and Kennett, 1998; Kim and Kucera, 2000)
CC04	36.3	124.5	83	2.25	Gravity Core	0.3	Lithology	Yes	(Kim and Kucera, 2000)
C9241	35.49	122.5	60.34	3	Gravity Core	3	Grain size data	No	(Lan and Shen, 2000, 2002)
C9247	35.49	123.74	77.35	6	Gravity Core	1.6	Grain size data	Yes	(Lan and Shen, 2000, 2002)
NT1	35.44	123.4	74.6	70.25	Drilling Core	2.2	Grain size data	Yes	(Lan et al., 2009)
H07	35.98	122.99	\	2.75	Gravity Core	2.75	Grain size data	No	(Leng et al., 2017)
H-106	35.5	123	70	6.07	Gravity Core	3.99	Grain size data	Yes	(Li et al., 1991)
YSC-4	35.97	122.83	69.8	4.61	Gravity Core	4.61	Grain size data	No	(Li et al., 2014b)
EZ06-1	35.83	123.9	78.2	3.7	Piston Core	2.5	Grain size data	Yes	(Lim et al., 2015)
EZ06-2	35.83	124.39	78.9	3.6	Piston Core	1	Grain size data	Yes	(Lim et al., 2015)
EZ06-6	35.44	123.86	76.4	3.5	Piston Core	1.2	Grain size data	Yes	(Lim et al., 2015)
H80-11	35	122.83	73	5.18	Gravity Core	2.5	Grain size data	Yes	(Liu et al., 1987)
H80-13	36	123	71	4.9	Gravity Core	3.2	Grain size data	Yes	(Liu et al., 1987)
H80-14	36	124.5	73	5.88	Gravity Core	1.2	Grain size data	Yes	(Liu et al., 1987)
H80-8	34	124.17	81	6.1	Gravity Core	0	Grain size data	\	(Liu et al., 1987)
YA111	36.3	123.37	77	3.2	Piston Core	0.6	Grain size data	Yes	(Liu et al., 2004)
YA131	36.25	123.92	77	3.55	Piston Core	0.56	Grain size data	Yes	(Liu et al., 2004)
CSDP-1	34.3	122.37	52.5	300.1	Drilling Core	0	Lithology	\	(Liu et al., 2016)
QC2	34.3	122.27	49.05	108.8	Drilling Core	2.63	Lithology	Yes	(Liu et al., 2016; Yang, 1993)
92-Ⅱ	36.25	124	78	4.25	Gravity Core	1.6	Lithology	Yes	(Meng et al., 1998)
Z1	35.3	123.7	78.5	1.96	Gravity Core	1.17	Grain size data	Yes	(Pi et al., 2016)
YSZ05	36.3	124	78	1.93	Gravity Core	0.6	Grain size data	Yes	(Wang, 2014)
YS2	36.2	124.3	78	2	Gravity Core	1.6	Grain size data	Yes	(Yang and Youn, 2007)
8408	34.27	122.59	64.3	3.7	Gravity Core	0	Lithology	Yes	(Yang, 1993)
YNH-107	34.83	123.19	\	3.8	Gravity Core	1.22	Grain size data	Yes	(Zhang et al., 2013)
YNH-111	34.11	123.19	69.2	3.85	Gravity Core	0.84	Grain size data	Yes	(Zhang et al., 2013)
YNH156	35.38	124.2	88.08	5.54	Gravity Core	0.24	Grain size data	Yes	(Zhang et al., 2013)
B10	36	123.99	80	5.5	Gravity Core	1.4	Grain size data	Yes	(Chen et al., Fu et al., 2003; Yang and Liu, 2007)
References
Ai, L., Han, Z., Wu, X., Saito, Y., Wang, H., 2020. Geochemical and Grain-Sized Implications for Provenance Variations of the Central Yellow Sea Muddy Area Since the Middle Holocene. Journal of Ocean University of China 19, 577-588.
Alexander, C.R., DeMaster , D.J., Nittrouer, C.A., 1991. Sediment accumulation in a modern epicontinental-shelf setting: The Yellow Sea. Marine Geology 98, 51-72.
Badejo, A.O., Choi, B.-H., Cho, H.-G., Yi, H.-I., Shin, K.-H., 2016. Environmental change in Yellow Sea during the last deglaciation to the early Holocene (15,000–8,000 BP). Quaternary International 392, 112-124.
Badejo, A.O., Choi, B.H., Cho, H.G., Yi, H.I., Shin, K.H., 2014. A paleoenvironmental reconstruction of the last 15 000 cal yr BP via Yellow Sea sediments using biomarkers and isotopic composition of organic matter. Climate of the Past Discussions 10, 1527-1565.
Chough, S.K., Lee, H.J., Chun, S.S., Shinn, Y.J., 2004. Depositional processes of late Quaternary sediments in the Yellow Sea: a review. Geosciences Journal 8, 211-264.
Fu, M., Li, Z., Xu, X., Shi, X., 2003. Sporopollen analysis of Core B10 in the southern Yellow Sea and the reflected characteristics of climate changes. Chinese Science Bulletin 48, 42-48.
Ge, S., Shi, X., Zhu, R., Liu, Y., Yin, P., Liu, L., 2006. Magnetostratigraphy of borehole EY02-2 in the southern Yellow Sea and its paleoenvironmental significance. Chinese Science Bulletin 51, 855-865.
Gong, F., Hao, T., Liu, Y., Liu, X., Zhang, D., Zhang, X., Xiang, R., Liu, Q., Li, X., 2017. Evidence for paleoclimate changes from lignin records of sediment core A02 in the southern Yellow Sea since ~ 9.5 cal. kyr B.P. Palaeogeography, Palaeoclimatology, Palaeoecology 479, 173-184.
Han, Z., Ai, L., Chen, X., Wang, C., Liu, H., Sun, Y., 2016. Geochemical Characteristics of Sediments and Provenance of B01 Core in Northwest Margin of South Yellow Sea Mud Area. Periodical of Ocean University of China 46, 82-91.
Hao, T., Liu, X.J., Ogg, J., Liang, Z., Xiang, R., Zhang, X.D., Zhang, D.H., Zhang, C., Liu, Q.L., Li, X.G., 2017. Intensified episodes of East Asian Winter Monsoon during the middle through late Holocene driven by North Atlantic cooling events: High-resolution lignin records from the South Yellow Sea, China. Earth and Planetary Science Letters 479, 144-155.
Hu, B., Li, J., Zhao, J., Yan, H., Zou, L., Bai, F., Xu, F., Yin, X., Wei, G., 2018. Sr–Nd isotopic geochemistry of Holocene sediments from the South Yellow Sea: Implications for provenance and monsoon variability. Chemical Geology 479, 102-112.
Hu, B.Q., Yang, Z.S., Zhao, M.X., Saito, Y., Fan, D.J., Wang, L.B., 2012. Grain size records reveal variability of the East Asian Winter Monsoon since the Middle Holocene in the Central Yellow Sea mud area, China. Science China: Earth Sciences 55, 1656-1668.
Jia, Y., Li, D.-W., Yu, M., Zhao, X., Xiang, R., Li, G., Zhang, H., Zhao, M., 2019. High- and low-latitude forcing on the south Yellow Sea surface water temperature variations during the Holocene. Global and Planetary Change 182, 103025.
Jiang, F., Zhou, X., Li, A., Li, T., 2009. Quantitatively distinguishing sediments from the Yangtze River and the Yellow River using δ EuN-ΣREEs plot. Science in China Series D: Earth Sciences 52, 232-241.
Kim, D., Park, B.K., Shin, I.C., 1999. Paleoenvironmental changes of the Yellow Sea during the Late Quaternary. Geo-Marine Letters, 189-194.
Kim, J.M., Kennett, J.P., 1998. Paleoenvironmental changes associated with the Holocene marine transgression, Yellow Sea (Hwanghae). Marine Micropaleontology 34, 71-89.
Kim, J.M., Kucera, M., 2000. Benthic foraminifer record of environmental changes in the Yellow Sea (Hwanghae) during the last 15,000 years. Quaternary Science Reviews 19, 1067-1085.
Lan, X., Shen, S., 2000. Geochemical Characteristics of Sediment Cores From The Central South Yellow Sea. Marine Geology & Quaternary Geology 20, 33-38.
Lan, X., Shen, S., 2002. Geochemical Characteristics of Rare Earth Elements of Sediment Cores from the Central South Yellow Sea. Marine science bulletin 21, 46-53.
Lan, X., Zhang, X., Zhao, G., Zhang, Z., 2009. Distributions of rare earth elements in sediments from Core NT1 of the South Yellow Sea and their provenance discrimination. Geochimica 38, 123-132.
Leng, C., Yuan, H., Xu, C., Hao, Y., Zhao, G., 2017. Applications of Logarithm Ratio Transformation to Extraction of the Sensitive Grain Size of East Asian Winter Monsoon by the Method of Factor Analysis: A Case Study of Core H07 from The Central Mud Area of the South Yellow Sea. Marine Geology & Quaternary Geology 37, 151-160.
Li, A.C., Chen, L.R., Shen, S.X., 1991. Sulfur isotopic study of the authigenic pyrite in the downcore H-106 of the Southern Yellow Sea (in Chinese). Chinese Science Bulletin, 928-930.
Li, J., Hu, B.Q., Wei, H.L., Zhao, J.T., Zou, L.A., Bai, F.L., Dou, Y.U., Wang, L.B., Fang, X.H., 2014. Provenance variations in the Holocene deposits from the southern Yellow Sea: Clay mineralogy evidence. Continental Shelf Research 90, 41-51.
Lim, D., Xu, Z., Choi, J., Li, T., Kim, S., 2015. Holocene changes in detrital sediment supply to the eastern part of the central Yellow Sea and their forcing mechanisms. Journal of Asian Earth Sciences 105, 18-31.
Liu, J., Liu, Q., Zhang, X., Liu, J., Wu, Z., Mei, X., Shi, X., Zhao, Q., 2016. Magnetostratigraphy of a long Quaternary sediment core in the South Yellow Sea. Quaternary Science Reviews 144, 1-15.
Liu, J., Wang, H., Li, S., Jin, X., 2004. Postglacial Transgressive Sedimentary Records of Muddy Sedimentary Areas in the North of The South Yellow Sea. Marine Geology & Quaternary Geology 24, 1-10.
Liu, M., Wu, S., Wang, Y., 1987. Late Quaternary sediments in the Yellow Sea. Ocean Press, Beijing.
Meng, G., Han, Y., Wang, S., 1998. Paleoclimate events and environment evolution of the shelf area in the south yellow sea during the past 15ka. Oceanologia et limnologia sinica 29, 297-305.
Pi, Z., Li, T., Nan, Q., 2016. Environmental Changes Since Mid Holocene Revealed by Core Z1 in the South Yellow Sea and Their Response to East Asian Monsoon. Marine Geology Frontiers 32, 1-10.
Shinn, Y.J., Chough, S.K., Kim, J.W., Lee, S.H., Woo, J., Jin, J.H., Hwang, S.Y., Choi, S.H., Suh, M.C., 2004. High‐Resolution Seismic Reflection Studies of Late Quaternary Sediments in the Eastern Yellow Sea, Continent‐Ocean Interactions Within East Asian Marginal Seas.
Wang, K., Wang, Y., Xu, J., Zhang, Y., Jiang, H., 1987. Comprehensive and systematic spores, pollen and algae research in the Yellow Sea. Ocean Press Beijing.
Wang, L., 2014. Sediment record of Paleoenvironment of the central mud of the South Yellow Sea and its response to the East Asian Monsoon during the Holocene. Ocean University of China, Qingdao, p. 91.
Wang, L., Yang, Z., Zhang, R., Fan, D., Zhao, M., Hu, B., 2011. Sea surface temperature records of core ZY2 from the central mud area in the South Yellow Sea during last 6200 years and related effect of the Yellow Sea Warm Current. Chinese Science Bulletin 56, 1588-1595.
Wang, Y.H., Li, G.X., Zhang, W.G., Dong, P., 2014. Sedimentary environment and formation mechanism of the mud deposit in the central South Yellow Sea during the past 40 kyr. Marine Geology 347, 123-135.
Wu, P., Xiao, X., Tao, S., Yang, Z., Zhang, H., Li, L., Zhao, M., 2016. Biomarker evidence for changes in terrestrial organic matter input into the Yellow Sea mud area during the Holocene. Science China Earth Sciences 59, 1216-1224.
Wu, X., Xing, L., Jiang, Y., Zhang, X., Xiang, R., Zhou, L., 2019. High-resolution reconstruction of sedimentary organic matter variability during the Holocene in the mud area of the Yellow Sea using multiple organic geochemical proxies. Quaternary International 503, 178-188.
Yang, S., Youn, J.-S., 2007. Geochemical compositions and provenance discrimination of the central south Yellow Sea sediments. Marine Geology 243, 229-241.
Yang, Z., 1993. The sedimentary sequence and palaeogeographic changes of the south Yellow Sea since the Olduvai subchron. Acta Geologica Sinica 67, 357-366.
Yang, Z.S., Liu, J.P., 2007. A unique Yellow River-derived distal subaqueous delta in the Yellow Sea. Marine Geology 240, 169-176.
Zhang, X., Zhang, Z., Lan, X., Li, R., 2013. Regional geology of the South Yellow Sea.
Zheng, G., 1989. The Stratigraphic Correlation of the Quaternary Stratotype in the South Yellow Sea. Science Press, Beijing.
Zhong, F., Xiang, R., Yang, Y., Zhao, M., 2018. Evolution of the Southern Yellow Sea Cold Water Mass during the last 7 kyr from benthic foraminiferal evidence. Science China Earth Sciences 61, 1406-1418.
