# Supplementary material for: A Synthesized Study of the Spatiotemporal Evolution of Central Yellow Sea Mud Depositional Processes During the Holocene
Source: Frontiers journal article supplement (doi:10.3389/feart.2021.687344), 2021-05-28
Supplement: Table_2.XLSX [file Table_2.XLSX]

## Sheet: Age dating points
Sample No.	Depth (cm)	Materials	AMS 14C ages(years B.P.)	Calendar age(years B.P.)	2σ error bars(years B.P.)	References		Citaion
ZY-1-1	45	Mixed Foraminifera	1500±40	1171	979-1333	(Hu et al., 2012)		Calib 8.20	Stuiver, M., Reimer, P.J., and Reimer, R.W., 2021, CALIB 8.2 [WWW program] at http://calib.org, accessed 2021-4-24
ZY-1-2	155	Mixed Foraminifera	2750±40	2636	2406-2833	(Hu et al., 2012)		Marine20	Heaton TJ, Köhler P, Butzin M, Bard E, Reimer RW, Austin WEN, Bronk Ramsey C, Grootes PM, Hughen KA, Kromer B, Reimer PJ, Adkins J, Burke A, Cook MS, Olsen J, Skinner LC. 2020. Marine20-the marine radiocarbon age calibration curve (0-55,000 cal BP). Radiocarbon 62. doi: 10.1017/RDC.2020.68.
ZY-1-3	275	Mixed Foraminifera	3820±40	3958	3717-4188	(Hu et al., 2012)
ZY-1-4	375	Mixed Foraminifera	5270±50	5735	5534-5935	(Hu et al., 2012)
ZY-2-1	68	Mixed Foraminifera	1825±30	1503	1329-1693	(Hu et al., 2012)
ZY-2-2	129	Mixed Foraminifera	2345±40	2138	1924-2334	(Hu et al., 2012)
ZY-2-3	238	Mixed Foraminifera	3955±40	4138	3909-4378	(Hu et al., 2012)
ZY-2-4	273	Mixed Foraminifera	4450±45	4773	4529-5006	(Hu et al., 2012)
ZY-2-5	330	Mixed Foraminifera	5555±40	6050	5868-6257	(Hu et al., 2012)
ZY-3-1	26	Mixed Foraminifera	2670±40	2546	2338-2729	(Hu et al., 2012)
ZY-3-2	65	Mixed Foraminifera	3480±40	3520	3320-3743	(Hu et al., 2012)
ZY-3-3	168	Mixed Foraminifera	4860±40	5299	5045-5500	(Hu et al., 2012)
ZY-3-4	359	Mixed Foraminifera	6500±50	7084	6863-7288	(Hu et al., 2012)
YS01-C-1	0.0-2.0	Mixed benthic foraminifera	630±30	373	201-522	(Wang et al., 2017)
YS01-C-2	20.0-26.0	Mixed benthic foraminifera	1210±25	866	699-1043	(Liu et al., 2020)
YS01-C-3	120.0-126.0	Mixed benthic foraminifera	2090±25	1817	1613-2008	(Liu et al., 2020)
YS01-C-4	217.0-223.0	Mixed benthic foraminifera	2710±25	2591	2372-2754	(Liu et al., 2020)
YS01-C-5	317.0-323.0	Mixed benthic foraminifera	3010±35	2944	2749-3152	(Liu et al., 2020)
YS01-A-1	413.5-417.5	Mixed benthic foraminifera	3230±30	3223	3005-3409	(Wang et al., 2014)
YS01-A-2	515.5-520.5	Mixed benthic foraminifera	3740±45	3851	3614-4087	(Wang et al., 2014)
YS01-A-3	598.7-602.7	Mixed benthic foraminifera	4300±30	4595	4396-4810	(Jia et al., 2019)
YS01-A-4	691.3-695.3	Mixed benthic foraminifera	4950±35	5397	5208-5585	(Wang et al., 2014)
YS01-A-5	778.0-782.0	Mixed benthic foraminifera	5180±45	5641	5450-5861	(Wang et al., 2014)
YS01-A-6	852.0-856.0	Mixed benthic foraminifera	5530±30	6025	5835-6226	(Jia et al., 2019)
YS01-A-7	876.1-880.1	Mixed benthic foraminifera	6190±35	6733	6521-6944	(Wang et al., 2014)
YS01-A-8	978.8-982.8	Mixed benthic foraminifera	6800±55	7382	7193-7564	(Wang et al., 2014)
YS01-A-9	1130.7-1134.7	Mixed benthic foraminifera	9820±40	11014	10752-11212	(Wang et al., 2014)
N02-1	0-4	Mixed benthic foraminifera	305±25	0		(Hao et al., 2017)
N02-2	34-36	Mixed benthic foraminifera	1855±40	1539	1342-1730	(Hao et al., 2017)
N02-3	70-74	Mixed benthic foraminifera	2705±30	2585	2365-2750	(Hao et al., 2017)
N02-4	90-94	Mixed benthic foraminifera	3215±35	3204	2982-3396	(Hao et al., 2017)
N02-5	116-122	Mixed benthic foraminifera	3795±35	3925	3696-4145	(Hao et al., 2017)
N02-6	162-166	Mixed benthic foraminifera	4195±30	4456	4229-4695	(Hao et al., 2017)
N02-7	216-222	Mixed benthic foraminifera	5130±30	5585	5382-5790	(Hao et al., 2017)
N02-8	256-260	Mixed benthic foraminifera	5720±40	6222	6001-6405	(Hao et al., 2017)
N02-9	292-298	Mixed benthic foraminifera	6325±35	6888	6677-7112	(Zhong et al., 2018)
A02-1	0-2	Mixed benthic foraminifera	280±25	0		(Gong et al., 2017)
A02-2	38-42	Mixed benthic foraminifera	2305±25	2086	1893-2296	(Gong et al., 2017)
A02-3	80-84	Mixed benthic foraminifera	3355±30	3370	3170-3564	(Gong et al., 2017)
A02-4	129-133	Mixed benthic foraminifera	4375±40	4683	4440-4872	(Gong et al., 2017)
A02-5	177-183	Mixed benthic foraminifera	5070±45	5519	5313-5714	(Gong et al., 2017)
A02-6	227-233	Mixed benthic foraminifera	6090±35	6617	6407-6824	(Gong et al., 2017)
A02-7	307-309	Shell fragments	8940±30	9792	9543-10048	This study
A02-8	335-337	Mixed benthic foraminifera	9660±60	10795	10516-11081	(Wu et al., 2019)
HS1-1	70	Foraminifera	2550±30	2401	2183-2643	(Ai et al., 2020)
HS1-2	120	Foraminifera	3310±30	3315	3108-3507	(Ai et al., 2020)
HS1-3	180	Foraminifera	4350±30	4655	4436-4838	(Ai et al., 2020)
HS1-4	215	Foraminifera	4860±30	5300	5051-5488	(Ai et al., 2020)
A03-1	2-6	Mixed benthic foraminifera	505±20	238	52-425	(Jia et al., 2019)
A03-2	50-52	Mixed benthic foraminifera	1975±20	1677	1498-1873	(Jia et al., 2019)
A03-3	96-100	Mixed benthic foraminifera	3095±20	3051	2843-3253	(Jia et al., 2019)
A03-4	146-150	Mixed benthic foraminifera	4065±20	4283	4076-4497	(Jia et al., 2019)
A03-5	188-190	Mixed benthic foraminifera	4725±20	5127	4893-5314	(Jia et al., 2019)
A03-6	238-242	Mixed benthic foraminifera	6070±25	6594	6394-6788	(Jia et al., 2019)
A03-7	276-282	Mixed benthic foraminifera Shell fragments	7580±25	8140	7970-8320	(Jia et al., 2019)
C04-1	22-24	Mixed benthic foraminifera	1750±20	1424	1270-1597	This study
C04-2	62-64	Mixed benthic foraminifera	3520±25	3567	3372-3775	This study
C04-3	120-124	Mixed benthic foraminifera	5625±30	6121	5926-6289	This study
C04-4	172-176	Mixed benthic foraminifera Shell fragments	6750±25	7338	7165-7493	This study
C04-5	204-206	Shell fragments	8030±30	8649	8428-8896	This study
C04-6	292-294	Shell fragments	10860±35	12513	12280-12689	This study
N04-1	0-4	Mixed benthic foraminifera	535±25	273	82-450	This study
N04-2	20-22	Mixed benthic foraminifera	1230±20	888	716-1060	This study
N04-3	58-62	Mixed benthic foraminifera	2665±30	2541	2342-2720	This study
N04-4	100-102	Mixed benthic foraminifera	3930±35	4104	3879-4342	This study
N04-5	146-152	Mixed benthic foraminifera	5165±35	5624	5442-5842	This study
N04-6	218-224	Mixed benthic foraminifera	8255±40	8954	8692-9204	This study
N04-7	248-252	Mixed benthic foraminifera	10135±45	11432	11197-11708	This study
N04-8	300-304	Mixed benthic foraminifera	11040±60	12667	12468-12848	This study
N05-1	0-6	Mixed benthic foraminifera	445±35	178	0-337	This study
N05-2	38-42	Mixed benthic foraminifera	1965±45	1666	1456-1883	This study
N05-3	80-82	Mixed benthic foraminifera	3585±25	3649	3445-3850	This study
N05-4	118-122	Mixed benthic foraminifera	5035±35	5484	5292-5662	This study
N05-5	134-140	Mixed benthic foraminifera	6070±30	6594	6391-6792	This study
N05-6	176-184	Mixed benthic foraminifera	9920±30	11149	10889-11348	This study
N05-7	202-206	Mixed benthic foraminifera	9670±50	10810	10550-11083	This study
N05-8	246-250	Mixed benthic foraminifera	10295±50	11674	11357-11956	This study
H07-1	95	Mixed benthic foraminifera	3390±30	3412	3213-3613	(Leng et al., 2017)
H07-2	135	Mixed benthic foraminifera	4350±30	4655	4436-4838	(Leng et al., 2017)
H07-3	195	Mixed benthic foraminifera	5630±30	6126	5929-6293	(Leng et al., 2017)
YSC-1-1	100	Mixed benthic foraminifera	2940±30	2861	2695-3066	(Li, Hu, et al., 2014)
YSC-1-2	201	Mixed benthic foraminifera	4560±30	4920	4705-5182	(Li, Hu, et al., 2014)
YSC-1-3	300	Mixed benthic foraminifera	5990±40	6507	6303-6706	(Li, Hu, et al., 2014)
YSC-4-1	70	Mixed benthic foraminifera	2030±30	1746	1542-1937	(Li, Hu, et al., 2014)
YSC-4-2	210	Mixed benthic foraminifera	4000±30	4199	3974-4410	(Li, Hu, et al., 2014)
YSC-4-3	340	Mixed benthic foraminifera	5760±30	6265	6064-6454	(Li, Hu, et al., 2014)
CC02-1	15-25	Mixed Foraminifera	2200±100	1955	1668-2290	(Kim et al., 1999)
CC02-2	95	Ammonia ketienziensis	5370±60	5838	5602-6072	(Kim and Kennett, 1998)
CC02-3	170-180	Mixed Foraminifera	9840±200	11021	10417-11659	(Kim et al., 1999)
CC02-4	275	Ammonia beccarii	11340±80	12937	12724-13151	(Kim and Kennett, 1998)
